# Supplementary material for: Effect of Different Crowding Agents on the Architectural Properties of the Bacterial Nucleoid-Associated Protein HU
Source: MDPI journal article supplement (doi:10.3390/ijms21249553), 2020-12-15
Supplement: s1 [file s1]

## Supplementary information

SI figure 1 to 5 include multiple independent experiments which are labelled with different colours and patterns.

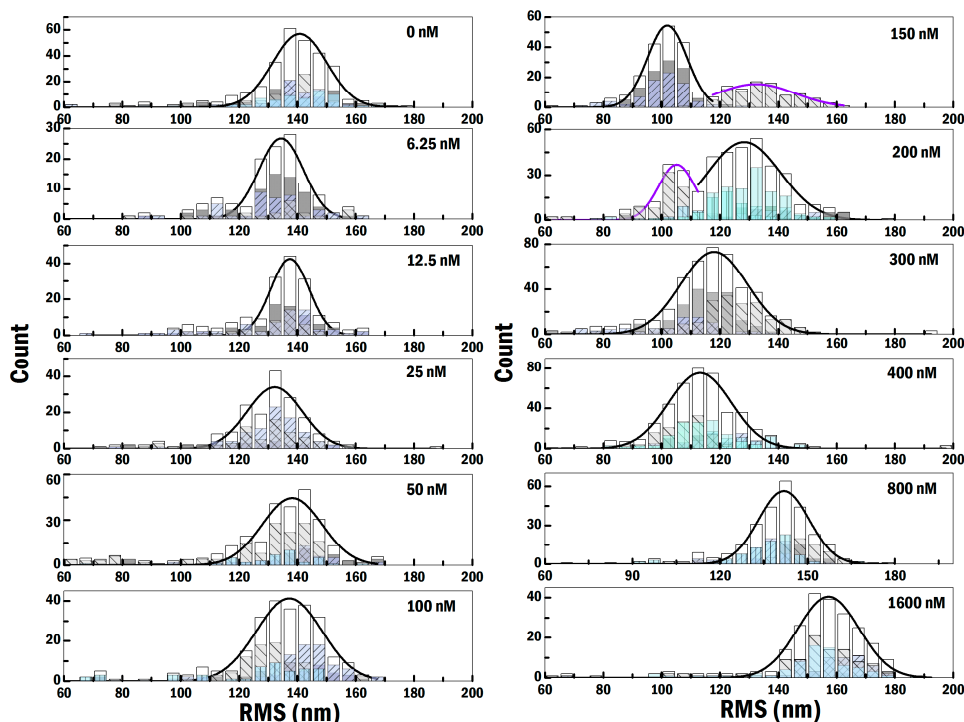

SI Figure 1A. Distribution of RMS values obtained at different HU concentration in the absence of MgCl<sub>2</sub>.

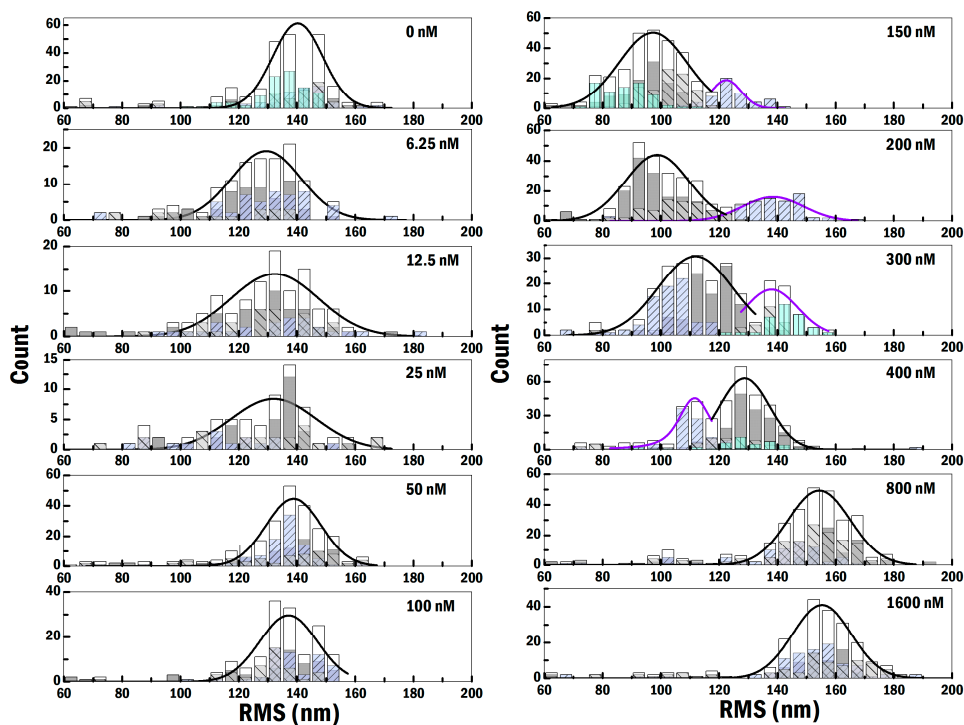

SI Figure 1B. Distribution of RMS values obtained at different HU concentration in the presence of MgCl<sub>2</sub>.

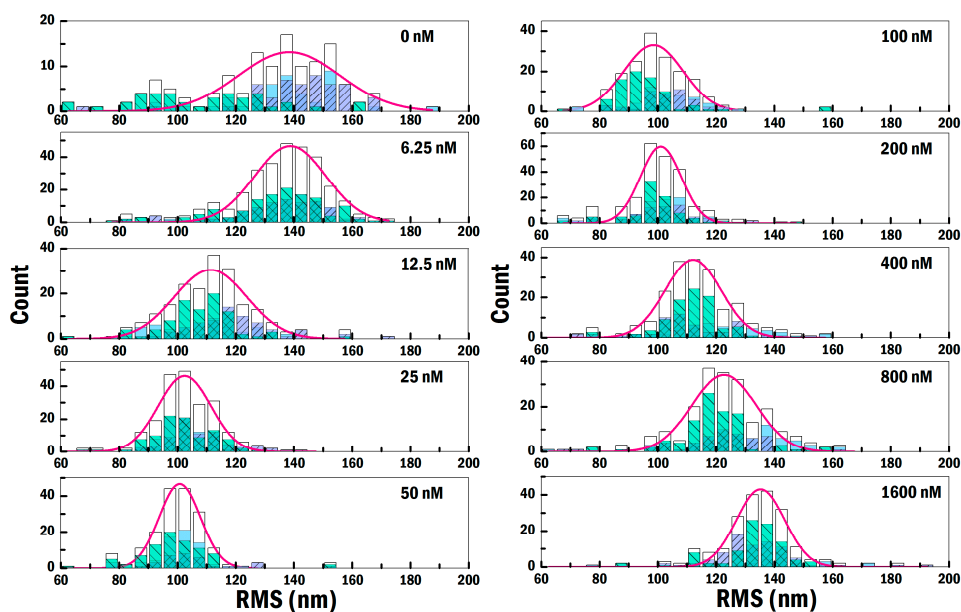

**SI Figure 2A. Distribution of RMS values obtained at different HU concentration in the presence of 0.5 % (w/v) BGB in the absence of MgCl<sub>2</sub>.**

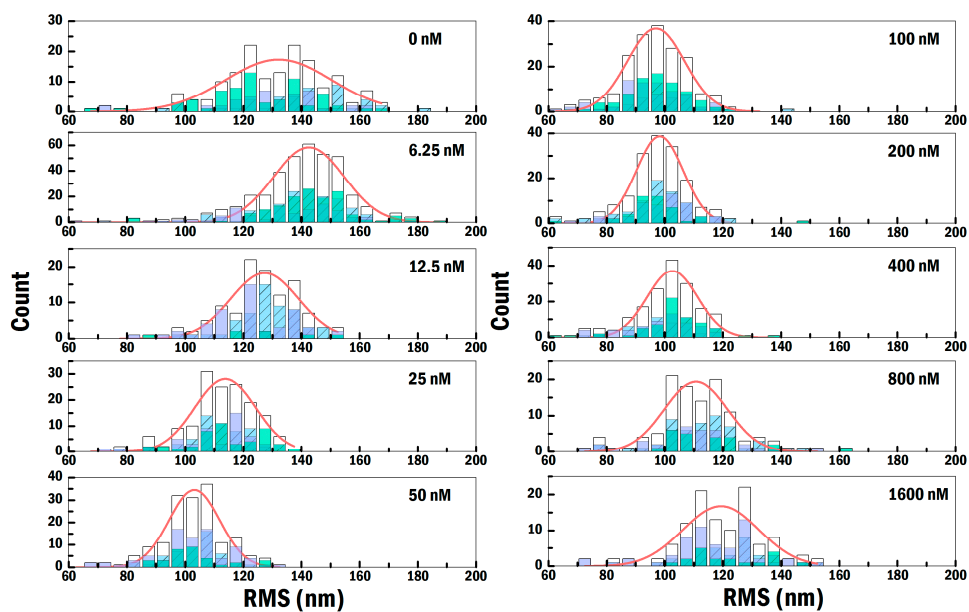

**SI Figure 2B. Distribution of RMS values obtained at different HU concentration in the presence of 1 % (w/v) BGB in the absence of MgCl<sub>2</sub>.**

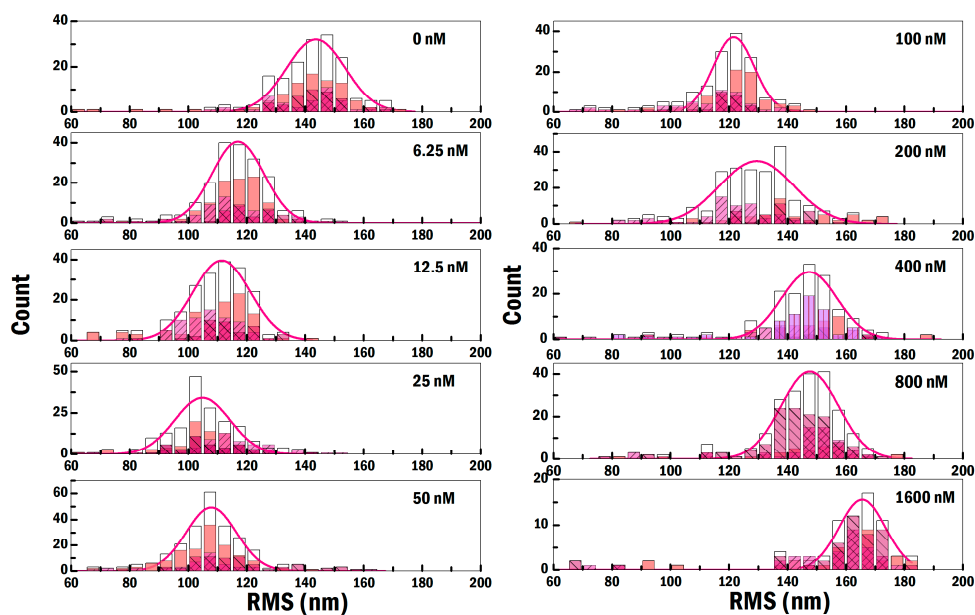

**SI Figure 3A. Distribution of RMS values obtained at different HU concentration in the presence of 1.25 % (w/v) BSA in the absence of  $MgCl_2$ .**

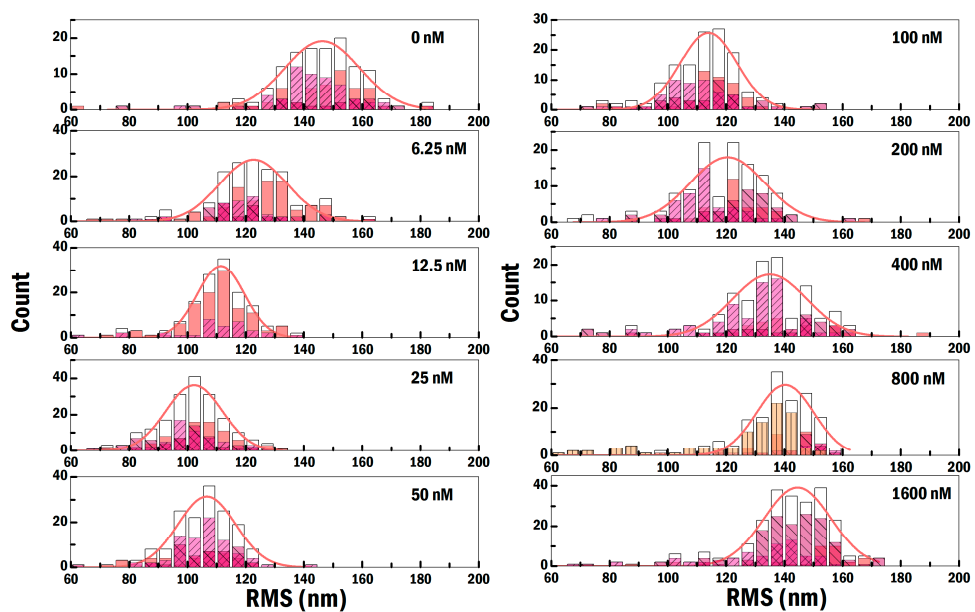

**SI Figure 3B. Distribution of RMS values obtained at different HU concentration in the presence of 5 % (w/v) BSA in the absence of  $MgCl_2$ .**

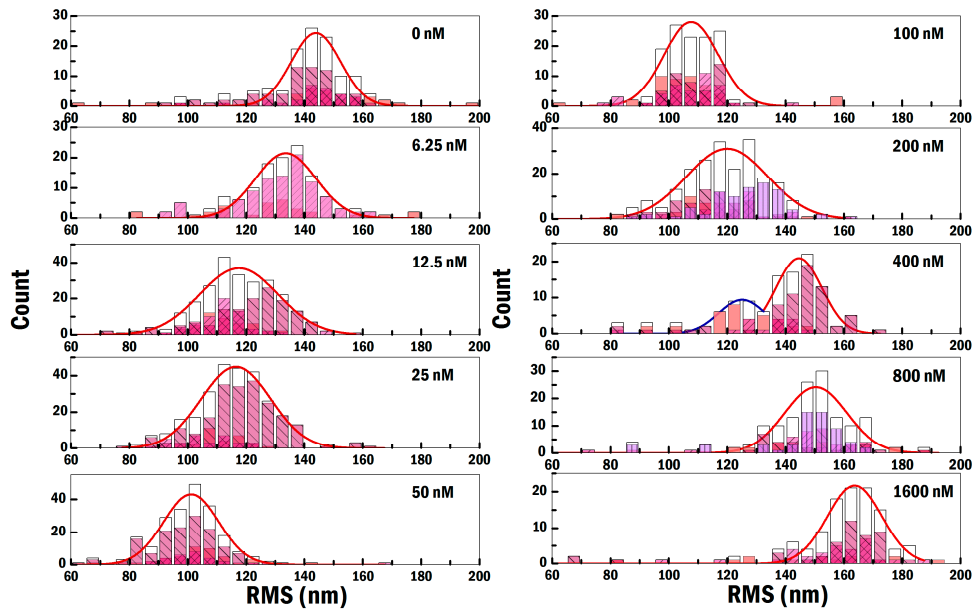

SI Figure 3C. Distribution of RMS values obtained at different HU concentration in the presence of 10 % (w/v) BSA in the absence of  $MgCl_2$ .

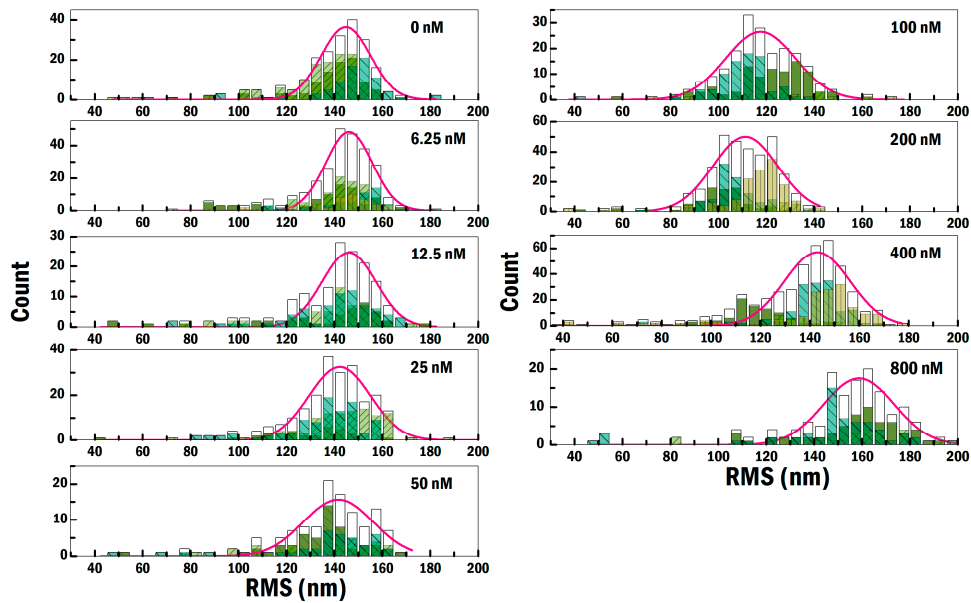

SI Figure 4A. Distribution of RMS values obtained at different HU concentration in the presence of 3 % (w/v) PEG8000 in the absence of  $MgCl_2$ .

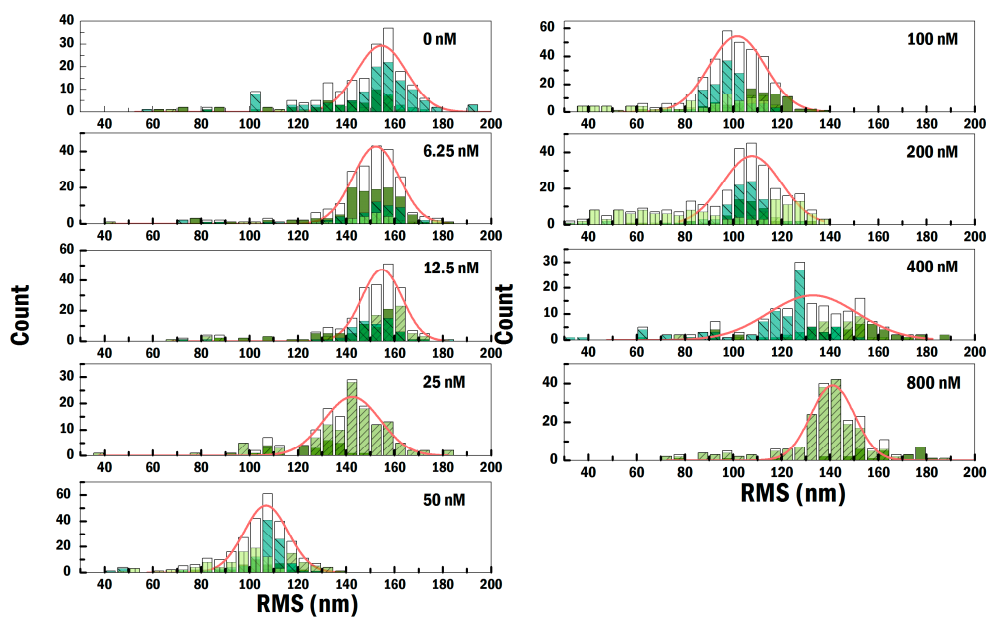

SI Figure 4B. Distribution of RMS values obtained at different HU concentration in the presence of 9 % (w/v) PEG8000 in the absence of  $MgCl_2$ .

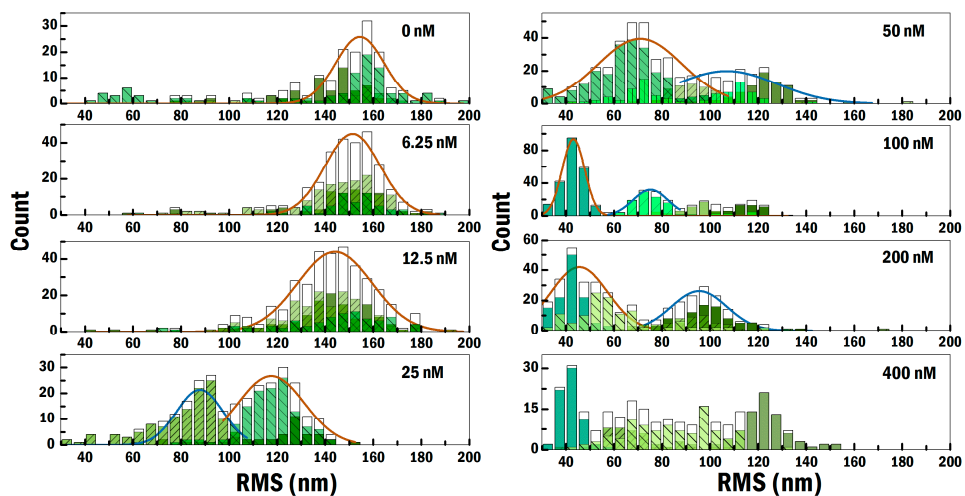

SI Figure 4C. Distribution of RMS values obtained at different HU concentration in the presence of 15 % (w/v) PEG8000 in the absence of  $MgCl_2$ .

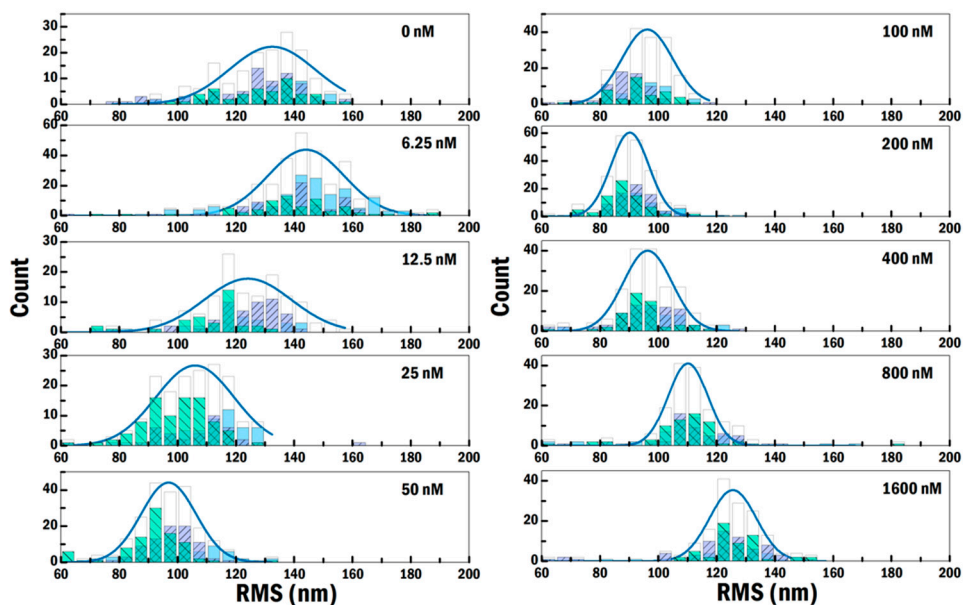

SI Figure 5A. Distribution of RMS values obtained at different HU concentration in the presence of 0.5 % (w/v) BGB in the presence of MgCl<sub>2</sub>.

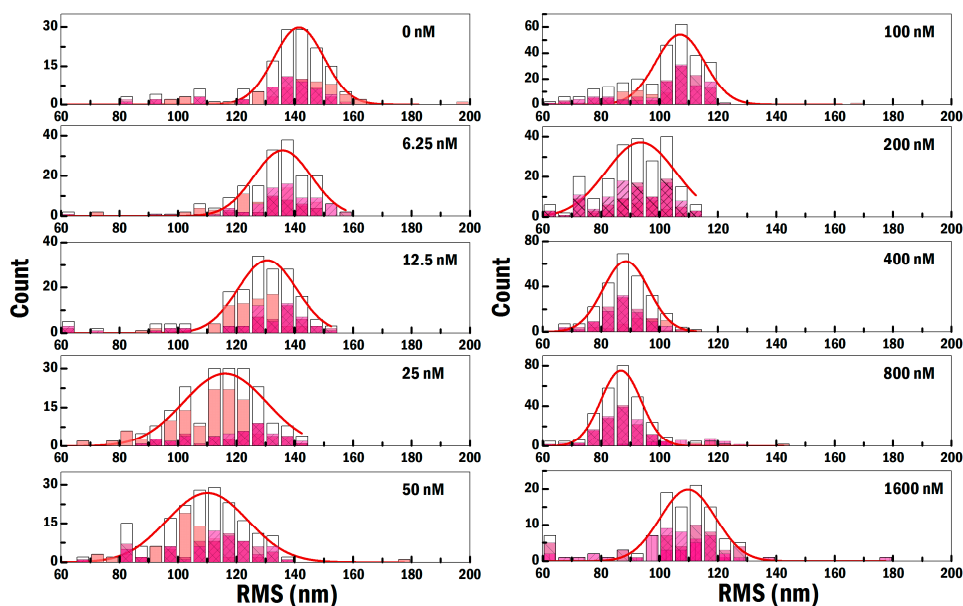

SI Figure 5B. Distribution of RMS values obtained at different HU concentration in the presence of 10 % (w/v) BSA in the presence of MgCl<sub>2</sub>.

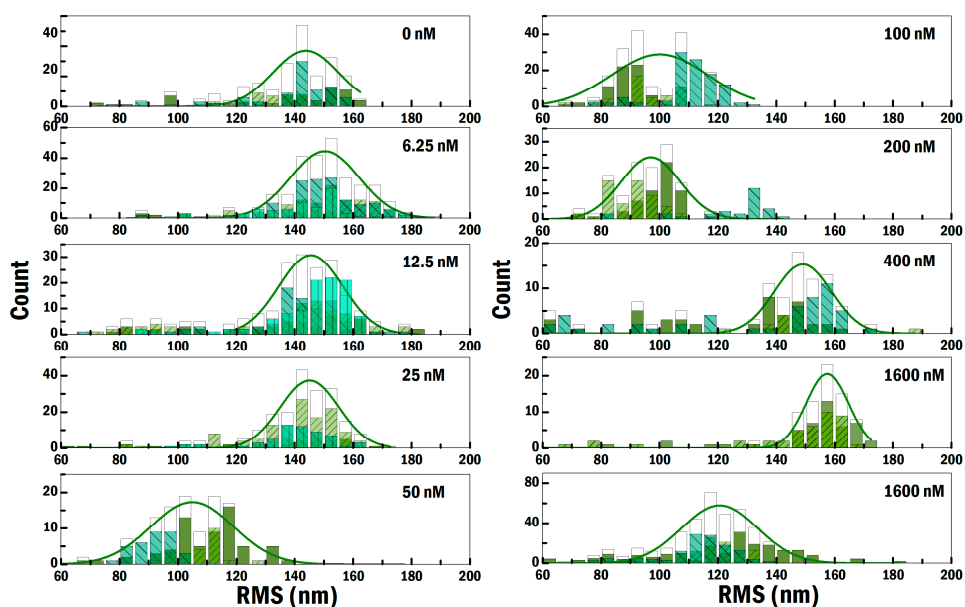

SI Figure 5C. Distribution of RMS values obtained at different HU concentration in the presence of 3 % (w/v) PEG8000 in the presence of  $MgCl_2$ .

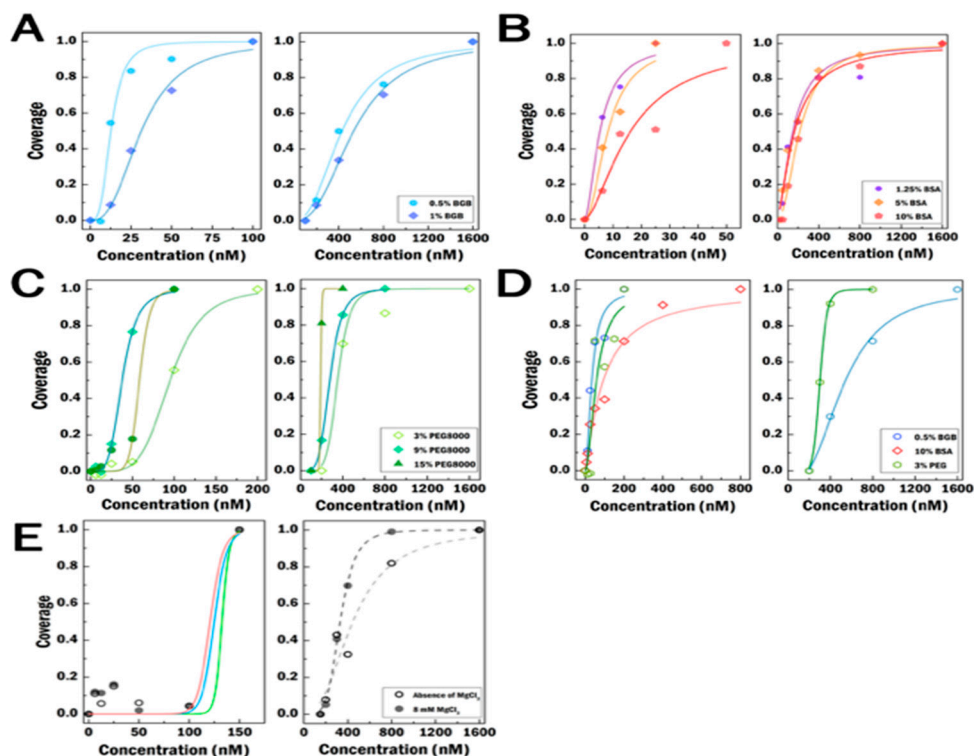

SI Figure 6. The fractional coverage as a function of HU concentration fitted by Hill function. A, B, C are the fittings of two HU binding modes in the absence of  $MgCl_2$  and with BSA, BGB, and PEG8000, respectively. D are the fittings of two HU binding modes in the presence of  $MgCl_2$  and with BSA, BGB, and PEG8000, respectively. E is in crowder-free condition in the presence (empty circle) or presence (solid circle) of  $MgCl_2$ . In the left plot of E shows theoretical curves are shown with cooperativity value of  $19 \pm 2$  (red),  $20 \pm 2$  (blue), and  $38 \pm 7$  (green). For each plot: left) DNA binding behavior in the compaction regime; right) DNA binding behavior in the extension regime.

**SI Table 1. The RMS values of HU-DNA in presence and absence of MgCl<sub>2</sub>.**

| HU Conc. (nM) | Without MgCl <sub>2</sub> * | N   | With 8 mM MgCl <sub>2</sub> ** | N   |
|---------------|-----------------------------|-----|--------------------------------|-----|
| 0             | 140.8 ± 0.4                 | 300 | 140.3 ± 0.6                    | 302 |
| 6.25          | 134.5 ± 0.7                 | 128 | 129 ± 1                        | 72  |
| 12.5          | 137.5 ± 0.6                 | 180 | 132 ± 1                        | 116 |
| 25            | 132.3 ± 0.7                 | 180 | 129 ± 1                        | 126 |
| 50            | 137.2 ± 0.6                 | 224 | 138.9 ± 0.7                    | 245 |
| 100           | 138.3 ± 0.4                 | 306 | 137.1 ± 1                      | 158 |
| 150           | 102.4 ± 0.7                 | 198 | 97.3 ± 0.8                     | 222 |
|               | 132 ± 1                     | 198 | 122 ± 1                        | 42  |
| 200           | 128.3 ± 0.8                 | 261 | 99 ± 1                         | 244 |
|               | 105.2 ± 0.6                 | 172 | 139 ± 1                        | 88  |
| 300           | 118.0 ± 0.5                 | 390 | 111.9 ± 0.6                    | 190 |
|               |                             |     | 138 ± 3                        | 58  |
| 400           | 113.4 ± 0.7                 | 393 | 125 ± 1                        | 265 |
|               |                             |     | 111.6 ± 0.8                    | 34  |
| 800           | 141.9 ± 0.4                 | 195 | 154.4 ± 0.7                    | 305 |
| 1600          | 157.2 ± 0.4                 | 161 | 155.3 ± 0.4                    | 235 |

\*Without MgCl<sub>2</sub>: 10 mM Tris (pH 7.5), 50 mM NaCl, 1 mM EDTA

\*\*Without 8 mM MgCl<sub>2</sub>: 10 mM Tris (pH 7.5), 50 mM NaCl, 8 mM MgCl<sub>2</sub>

**SI Table 2. The RMS values of HU-DNA in presence of BGB in buffer containing and absence of Mg<sup>2+</sup>.**

| HU Conc. (nM) | 0.5 % BGB without MgCl <sub>2</sub> | N   | 1 % BGB without MgCl <sub>2</sub> | N   | 0.5 % BGB without MgCl <sub>2</sub> | N   |
|---------------|-------------------------------------|-----|-----------------------------------|-----|-------------------------------------|-----|
| 0             | 138 ± 2                             | 134 | 132 ± 2                           | 162 | 133 ± 2                             | 171 |
| 6.25          | 138.8 ± 0.7                         | 313 | 143 ± 0.6                         | 385 | 144 ± 1                             | 312 |
| 12.5          | 111.4 ± 0.9                         | 201 | 127 ± 1                           | 111 | 124 ± 2                             | 118 |
| 25            | 102.5 ± 0.6                         | 225 | 113.8 ± 0.9                       | 153 | 106 ± 1                             | 176 |
| 50            | 100.8 ± 0.4                         | 183 | 103.2 ± 0.9                       | 164 | 96.9 ± 0.6                          | 227 |
| 100           | 98.5 ± 0.7                          | 173 | 97 ± 0.4                          | 191 | 96.2 ± 0.8                          | 170 |
| 200           | 101 ± 0.6                           | 246 | 98.3 ± 0.7                        | 172 | 90.3 ± 0.4                          | 22  |
| 400           | 112.1 ± 0.6                         | 211 | 102.6 ± 0.05                      | 175 | 96.4 ± 0.6                          | 184 |
| 800           | 123 ± 1                             | 211 | 111 ± 1                           | 114 | 110.2 ± 0.5                         | 171 |
| 1600          | 135.3 ± 0.4                         | 205 | 119 ± 2                           | 113 | 125.6 ± 0.6                         | 162 |



**SI Table 3. The RMS values of HU-DNA in presence of BSA in buffer containing and absence of Mg<sup>2+</sup>.**

| <b>HU Conc. (nM)</b> | <b>1.25 % BSA without MgCl<sub>2</sub></b> | <b>N</b> | <b>5 % BSA without MgCl<sub>2</sub></b> | <b>N</b> | <b>10 % BSA without MgCl<sub>2</sub></b> | <b>N</b> | <b>10 % BSA without MgCl<sub>2</sub></b> | <b>N</b> |
|----------------------|--------------------------------------------|----------|-----------------------------------------|----------|------------------------------------------|----------|------------------------------------------|----------|
| <b>0</b>             | 143.7 ± 0.5                                | 17<br>6  | 146.3 ± 0.7                             | 12<br>8  | 144 ± 0.6                                | 12<br>7  | 141.5 ± 0.5                              | 15<br>5  |
| <b>6.25</b>          | 117.0 ± 0.3                                | 19<br>8  | 125 ± 1                                 | 17<br>3  | 133.6 ± 0.8                              | 24<br>4  | 135.9 ± 0.8                              | 17<br>9  |
| <b>12.5</b>          | 111.5 ± 0.6                                | 20<br>7  | 101.8 ± 0.5                             | 44<br>1  | 117.6 ± 0.7                              | 24<br>9  | 130.6 ± 0.7                              | 18<br>8  |
| <b>25</b>            | 105 ± 1                                    | 18<br>3  | 102.3 ± 0.5                             | 19<br>0  | 116.5 ± 0.6                              | 27<br>7  | 116 ± 2                                  | 20<br>5  |
| <b>50</b>            | 107.9 ± 0.6                                | 24<br>7  | 106.7 ± 0.7                             | 16<br>2  | 101.2 ± 0.6                              | 22<br>4  | 110 ± 1                                  | 19<br>4  |
| <b>100</b>           | 121.6 ± 0.4                                | 17<br>0  | 114 ± 0.7                               | 14<br>0  | 107.7 ± 0.9                              | 13<br>4  | 107.1 ± 0.9                              | 27<br>5  |
| <b>200</b>           | 130 ± 1                                    | 24<br>1  | 121 ± 2                                 | 11<br>9  | 120 ± 0.9                                | 22<br>2  | 94 ± 1                                   | 22<br>5  |
| <b>400</b>           | 147.5 ± 0.6                                | 16<br>5  | 135 ± 1                                 | 12<br>1  | 142 ± 1                                  | 11<br>9  | 88.5 ± 0.4                               | 25<br>9  |
| <b>800</b>           | 147.6 ± 0.5                                | 22<br>1  | 140.3 ± 0.8                             | 16<br>8  | 150.4 ± 0.9                              | 14<br>5  | 86.8 ± 0.3                               | 28<br>4  |
| <b>1600</b>          | 165.6 ± 0.6                                | 11<br>1  | 144.6 ± 0.7                             | 24<br>7  | 163.7 ± 0.6                              | 12<br>3  | 112 ± 2                                  | 21<br>2  |

**SI Table 4. The RMS values of HU-DNA in presence of PEG8000 in buffer containing and absence of MgCl<sub>2</sub>.**

| <b>HU Conc. (nM)</b> | <b>3 % PEG8000 without MgCl<sub>2</sub></b> | <b>N</b> | <b>9 % PEG8000 without MgCl<sub>2</sub></b> | <b>N</b> | <b>15 % PEG8000 without MgCl<sub>2</sub></b> | <b>N</b> | <b>3 % PEG8000 without MgCl<sub>2</sub></b> | <b>N</b> |
|----------------------|---------------------------------------------|----------|---------------------------------------------|----------|----------------------------------------------|----------|---------------------------------------------|----------|
| <b>0</b>             | 144.8 ± 0.6                                 | 21<br>4  | 155 ± 1                                     | 19<br>4  | 154 ± 1                                      | 18<br>7  | 144 ± 2                                     | 19<br>2  |
| <b>6.25</b>          | 146.1 ± 0.6                                 | 27<br>1  | 152.3 ± 0.5                                 | 23<br>1  | 151.4 ± 0.5                                  | 28<br>6  | 150.3 ± 0.9                                 | 29<br>2  |
| <b>12.5</b>          | 146.1 ± 0.9                                 | 16<br>4  | 154.8 ± 0.6                                 | 20<br>0  | 144.1 ± 0.7                                  | 36<br>3  | 145.6 ± 0.9                                 |          |
| <b>25</b>            | 142.3 ± 0.7                                 | 22<br>7  | 143 ± 1                                     | 15<br>6  | 118 ± 1                                      | 14<br>7  | 145.1 ± 0.7                                 | 27<br>8  |
|                      |                                             |          |                                             |          | 88 ± 1                                       | 14<br>6  |                                             |          |
| <b>50</b>            | 142 ± 1                                     | 12<br>3  | 109.6 ± 0.6                                 | 27<br>3  | 107 ± 2                                      | 17<br>3  | 105 ± 1                                     | 12<br>5  |
|                      |                                             |          |                                             |          | 71 ± 2                                       | 27<br>5  |                                             |          |
| <b>100</b>           | 117.7 ± 0.9                                 | 19<br>9  | 102.2 ± 0.4                                 | 26<br>0  | 104 ± 3                                      | 21<br>0  | 90.2 ± 2                                    | 22<br>9  |
|                      |                                             |          |                                             |          | 43.1 ± 0.4                                   | 24<br>6  |                                             |          |
| <b>200</b>           | 104.3 ± 0.7                                 | 34<br>3  | 106.3 ± 0.4                                 | 29<br>9  | 97 ± 0.8                                     | 14<br>7  | 97 ± 2                                      | 14<br>3  |
|                      |                                             |          |                                             |          | 41 ± 1                                       | 25<br>1  |                                             |          |
| <b>400</b>           | 143 ± 1                                     | 44<br>5  | 133 ± 2                                     | 17<br>6  | 122 ± 0.7                                    | ---      | 149 ± 1                                     | 11<br>1  |
| <b>800</b>           | 159 ± 1                                     | 14<br>4  | 141.2 ± 0.8                                 | 22<br>5  | ---                                          | ---      | 157.5 ± 0.4                                 | 91       |
| <b>1600</b>          | ---                                         | ---      | ---                                         | ---      | ---                                          | ---      | 117.4 ± 0.5                                 | 43<br>8  |

**SI Table 5. Fitting values of Hill function.**

| <b>Conditions</b>                            | <b>Compactio<br/>n regime</b> | <b>Extensio<br/>n regime</b> |
|----------------------------------------------|-------------------------------|------------------------------|
| <b>Without<br/>MgCl<sub>2</sub></b>          | ---                           | 2.5 ± 0.6                    |
| <b>With 8 mM<br/>MgCl<sub>2</sub></b>        | ---                           | 4.9 ± 0.4                    |
| <b>0.5 % BGB</b>                             | 3.3 ± 0.9                     | 2.4 ± 0.3                    |
| <b>1 % BGB</b>                               | 2.6 ± 0.7                     | 2.5 ± 0.3                    |
| <b>1.25 % BSA</b>                            | 1.7 ± 0.5                     | 1.4 ± 0.2                    |
| <b>5 % BSA</b>                               | 2.0 ± 0.7                     | 2.0 ± 0.2                    |
| <b>10 % BSA</b>                              | 1.6 ± 0.6                     | 1.6 ± 0.2                    |
| <b>3 % PEG8000</b>                           | 5.0 ± 0.8                     | 6 ± 5                        |
| <b>9 % PEG8000</b>                           | 4.3 ± 0.2                     | 4.9 ± 0.1                    |
| <b>15 %<br/>PEG8000</b>                      | 10 ± 5                        | 35 ± 0                       |
| <b>0.5 % BGB<br/>with MgCl<sub>2</sub></b>   | 1.8 ± 0.5                     | 2.7 ± 0.7                    |
| <b>10 % BSA<br/>with MgCl<sub>2</sub></b>    | 1.2 ± 0.2                     | ---                          |
| <b>3 % PEG8000<br/>with MgCl<sub>2</sub></b> | 1.8 ± 0.7                     | 2.7 ± 0.7                    |
